# Supplementary material for: Untargeted HILIC-MS-Based Metabolomics Approach to Evaluate Coffee Roasting Process: Contributing to an Integrated Metabolomics Multiplatform
Source: PubMed Central journal article supplement (PMC7070313; doi:10.3390/molecules25040887), 2020-02-17

**UNTARGETED HILIC-MS-BASED METABOLOMICS APPROACH TO  
EVALUATE COFFEE ROASTING PROCESS: CONTRIBUTING TO AN  
INTEGRATED METABOLOMICS MULTIPLATFORM**

Raquel Pérez-Míguez<sup>1#</sup>, Maria Castro-Puyana<sup>1,2#</sup>, Elena Sánchez-López<sup>1,2</sup>, Merichel Plaza<sup>1,2</sup>, Maria Luisa Marina<sup>1,2\*</sup>.

<sup>1</sup>Departamento de Química Analítica, Química Física e Ingeniería Química, Universidad de Alcalá, Ctra. Madrid-Barcelona Km. 33.600, 28871 Alcalá de Henares (Madrid), Spain.

<sup>2</sup>Instituto de Investigación Química “Andrés M. del Río” (IQAR), Universidad de Alcalá, Ctra. Madrid-Barcelona Km. 33.600, 28871 Alcalá de Henares (Madrid), Spain.

<sup>#</sup>These authors contributed equally to this work.

**\*Correspondence:** [mluisa.marina@uah.es](mailto:mluisa.marina@uah.es); Fax: +34-918854971; Tel.: +34-918854935 (Departamento de Química Analítica, Química Física e Ingeniería Química, Universidad de Alcalá, Ctra. Madrid-Barcelona Km. 33.600, 28871 Alcalá de Henares (Madrid), Spain).

### **Figure captions.**

**Figure S1.** Base peak chromatograms (BPC) obtained in positive ionization mode for green coffee (GCB) (A); light coffee (LRC) (B); medium coffee (MRC) (C); and dark coffee (DRC) (D) under optimal separation conditions. HILIC-MS conditions are summarized in section 3.3.

**Figure S2.** Hierarchical cluster analysis (HCA) in positive (A) and negative (B) ionization modes for the four groups of coffee samples (GCB, LRC, MRC, and DRC) submitted to different roasting process.

**Figure S3.** Diagrams of the trends observed for all the tentatively and unequivocally compounds both in negative and positive ionization mode along the coffee roasting process.

**Figure S1.**

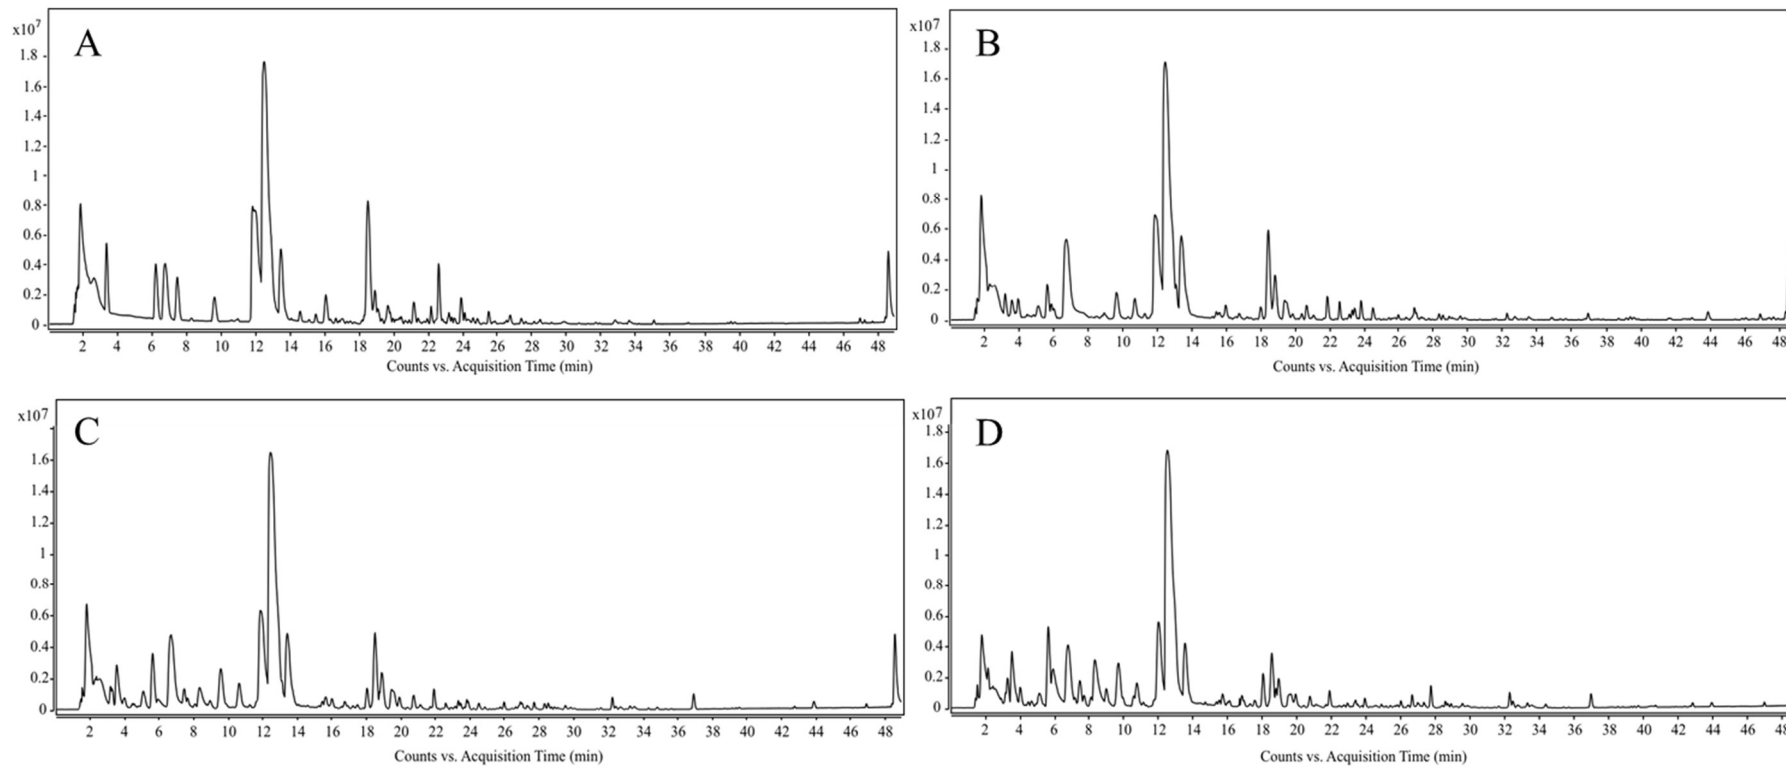

Figure S2-A

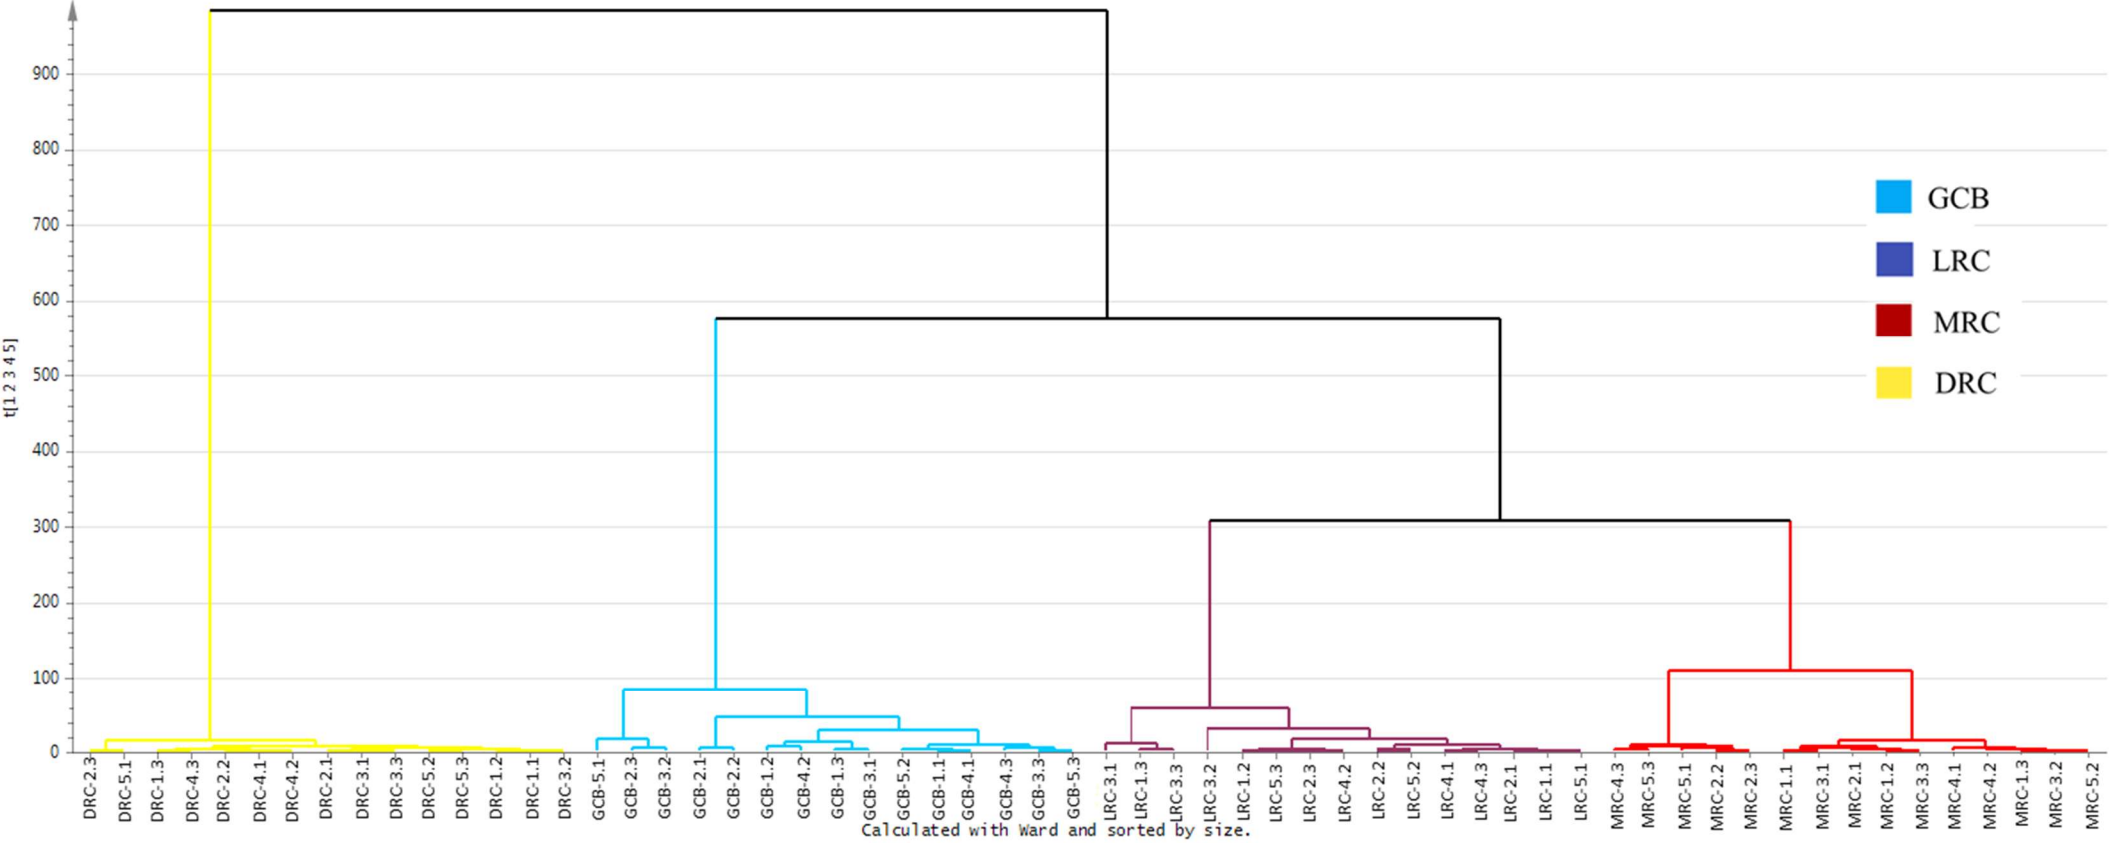

Figure S2-B

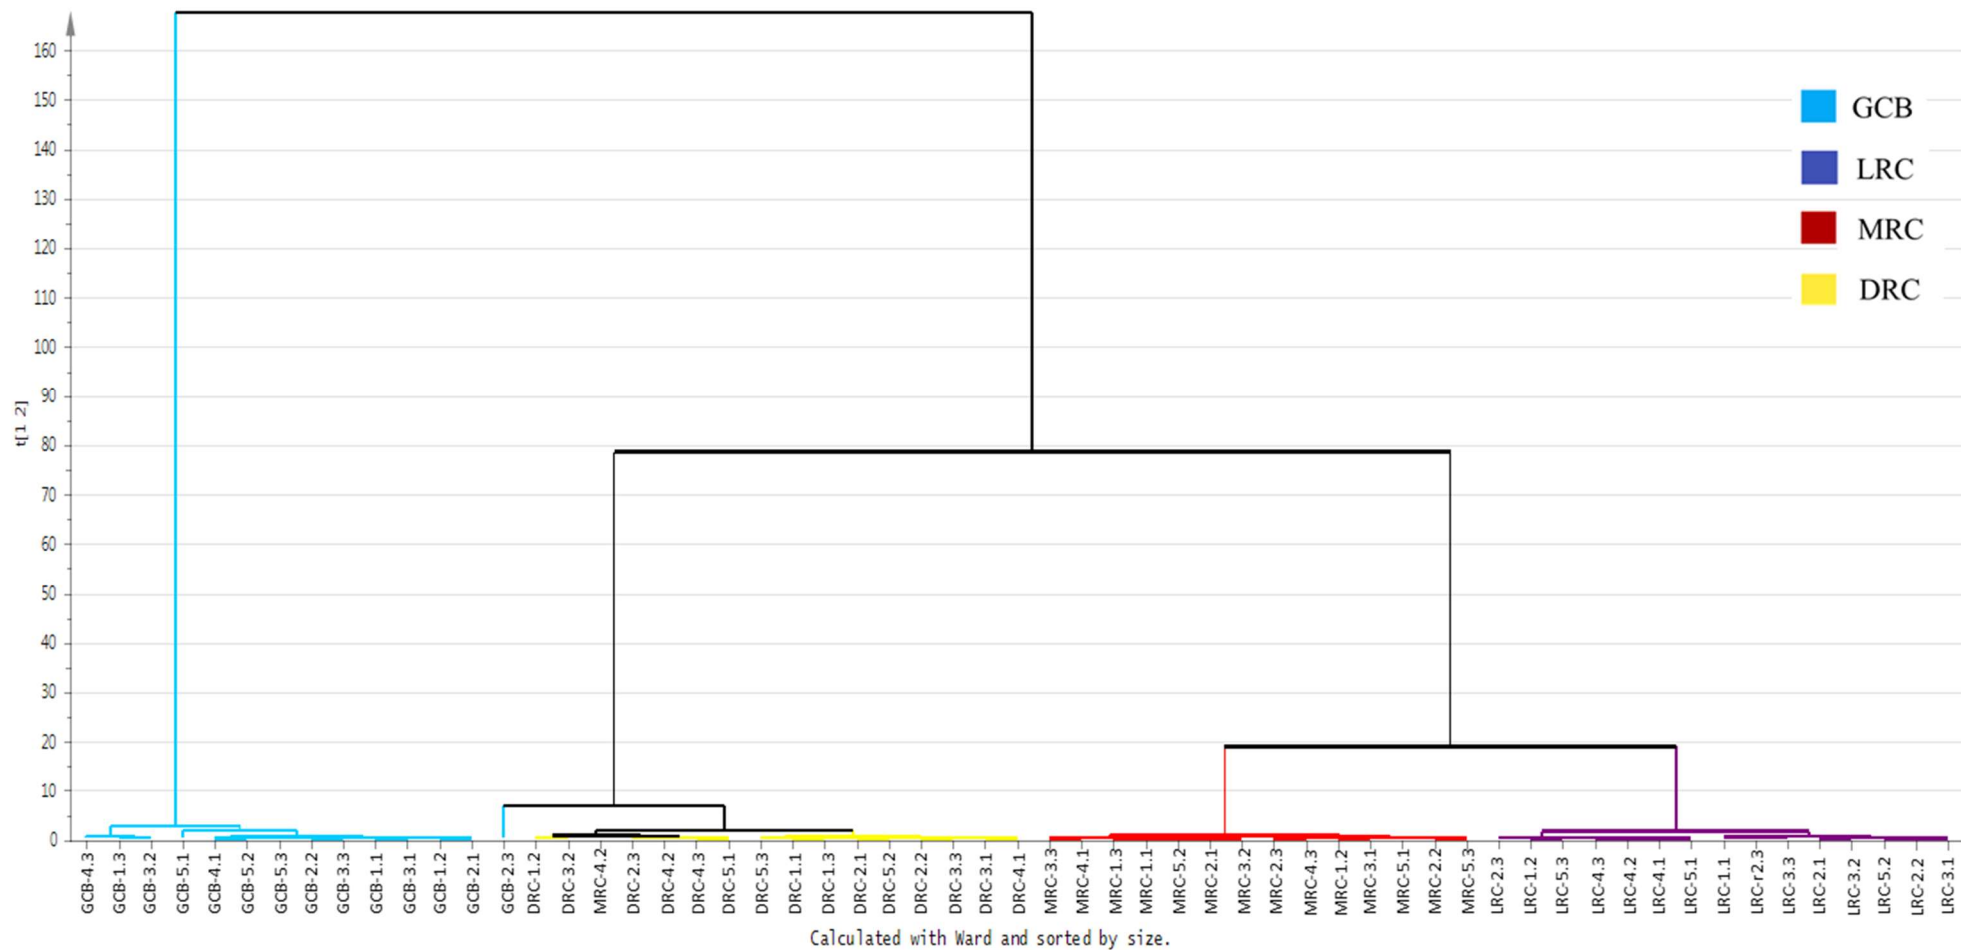

**Figure S3.**

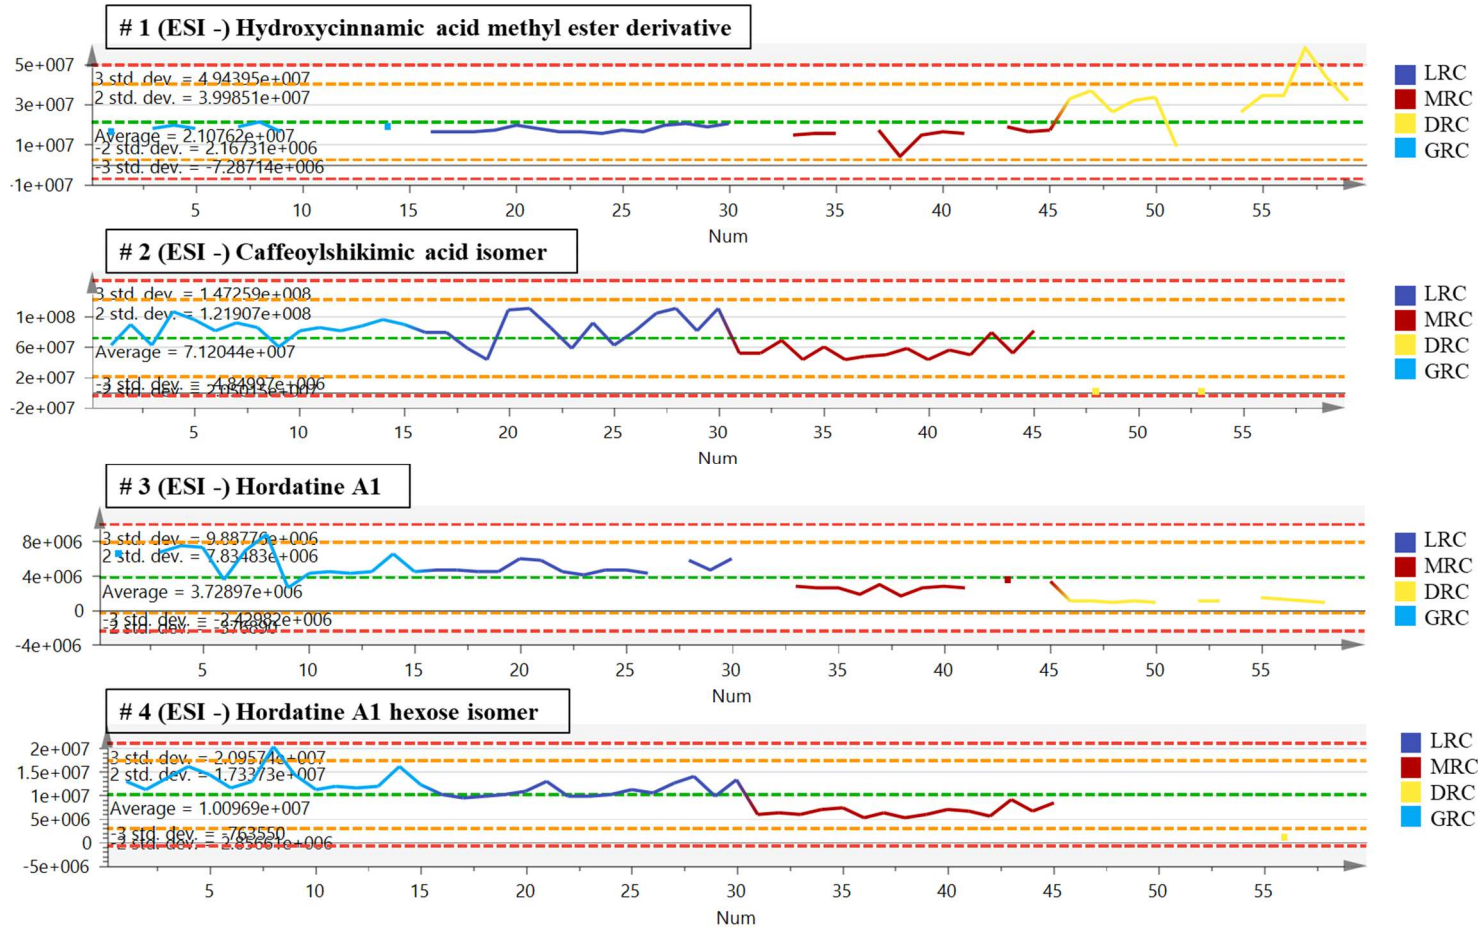

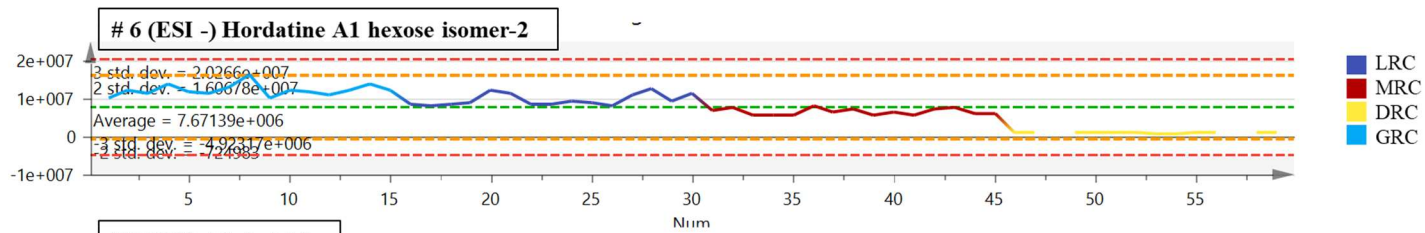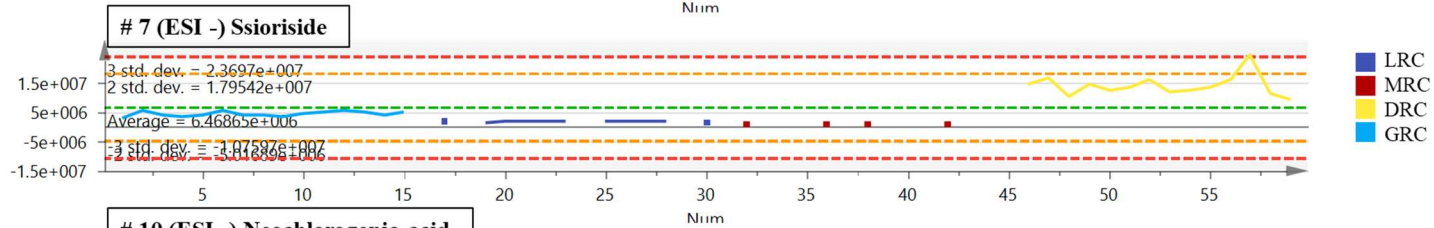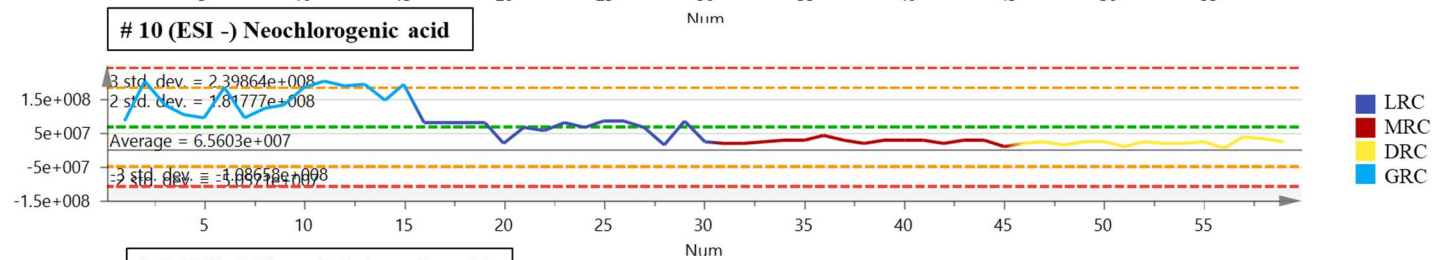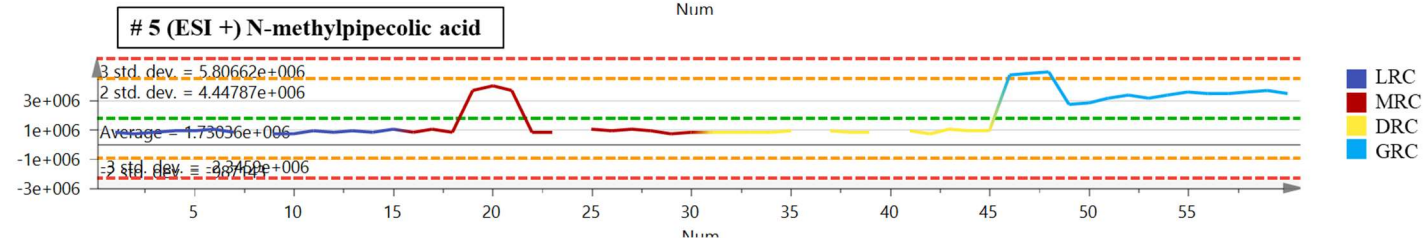

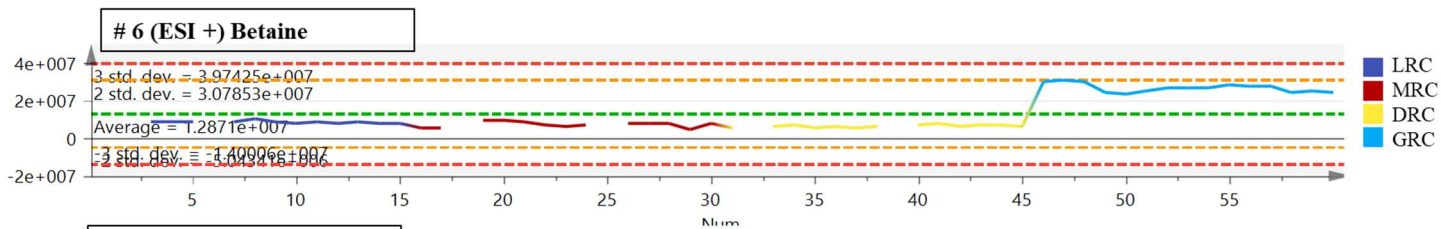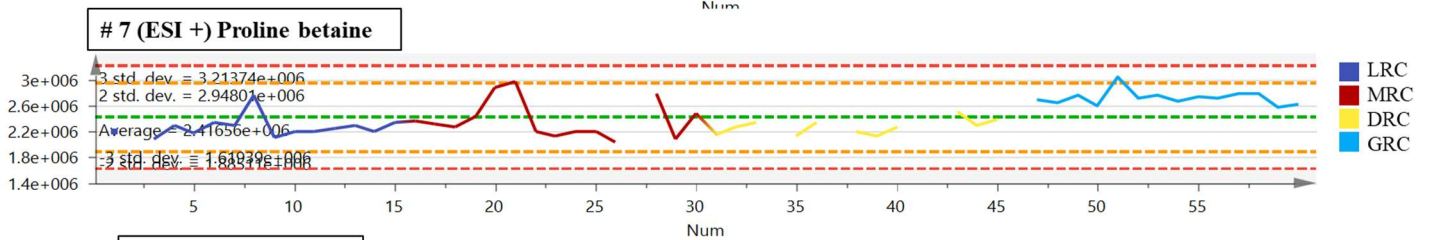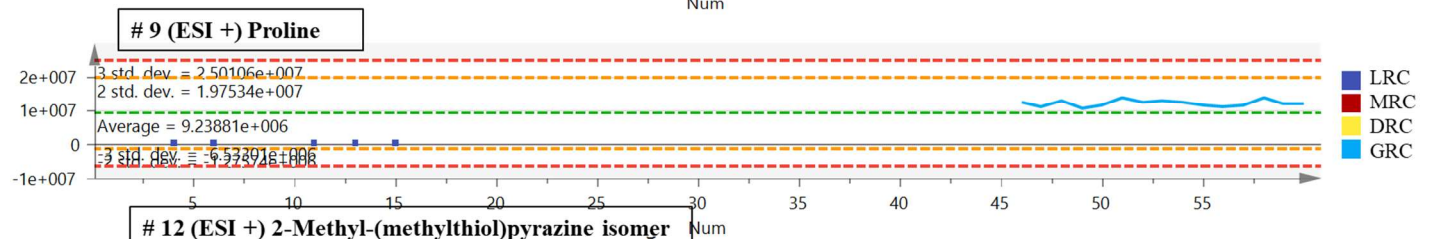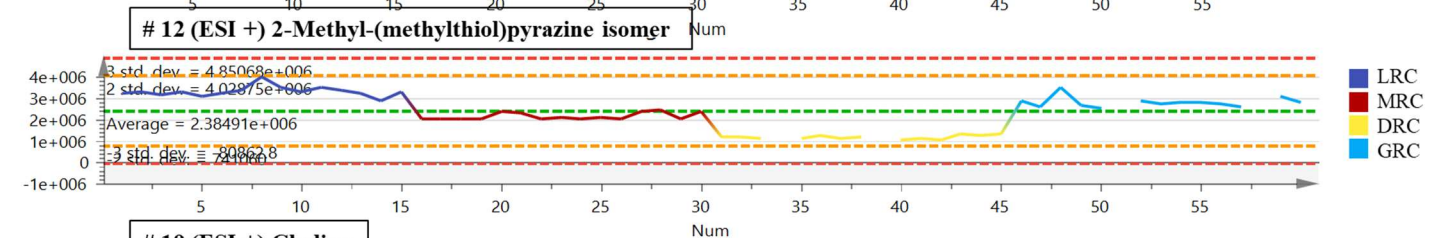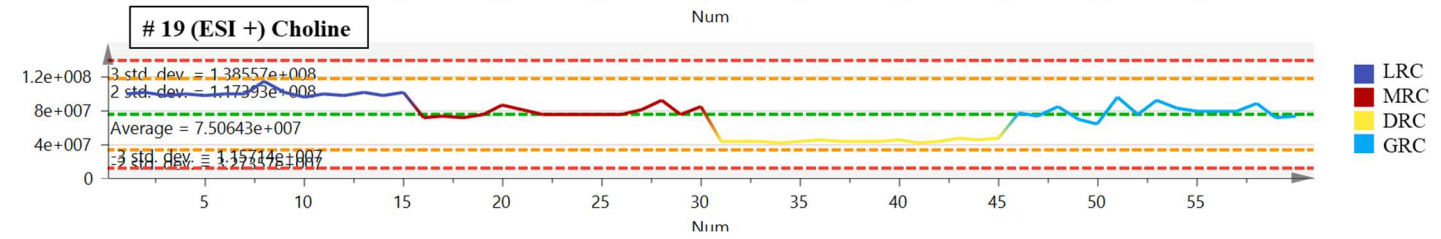

Supplement: molecules-25-00887-s001.pdf [file molecules-25-00887-s001.pdf]
